# Supplementary material for: Catalytic activity and autoprocessing of murine caspase-11 mediate noncanonical inflammasome assembly in response to cytosolic LPS
Source: eLife journal article supplement (doi:10.7554/elife.83725), 2023-12-07
Supplement: fig2-data5 [file elife-83725-fig2-data5-v1.zip]

Raw values for Figure 2F

| [zVAD] (μM) | Log(2)[zVAD] | % Speck formation |          |          |          |          |          |
|-------------|--------------|-------------------|----------|----------|----------|----------|----------|
|             |              | WT                |          |          | C254A    |          |          |
| DMSO        | 1.64385619   | 31.6091954        | 30.56478 | 31.08699 | 4.347826 | 3.040541 | 3.694183 |
| 25          | 4.64385619   | 12.37113402       | 8.759124 | 10.56513 | 2.222222 | 3.754266 | 2.988244 |
| 50          | 5.64385619   | 5.64516129        | 1.408451 | 3.526806 | 0        | 4.035874 | 2.017937 |
| 100         | 6.64385619   | 3.015075377       | 5.095541 | 4.055308 | 2.380952 | 3.313253 | 2.847103 |
| 200         | 7.64385619   | 4.504504505       | 0.653595 | 2.57905  | 2.966102 | 3.125    | 3.045551 |

| Statistics | WT | C254A |
|------------|----|-------|
|------------|----|-------|

Log(inhibitor) vs. response (three parameters)]

$Y = \text{Bottom} + (\text{Top} - \text{Bottom}) / (1 + 10^{-(X - \text{LogIC}_{50})})$

Best-fit values

|        |       |       |
|--------|-------|-------|
| Bottom | 3.046 | 2.658 |
|--------|-------|-------|

|     |       |       |
|-----|-------|-------|
| Top | 31.17 | 3.702 |
|-----|-------|-------|

|                     |       |       |
|---------------------|-------|-------|
| LogIC <sub>50</sub> | 4.201 | 4.094 |
|---------------------|-------|-------|

|                  |       |       |
|------------------|-------|-------|
| IC <sub>50</sub> | 15869 | 12416 |
|------------------|-------|-------|

|      |       |       |
|------|-------|-------|
| Span | 28.12 | 1.044 |
|------|-------|-------|

95% CI (profile likelihood)

|        |                |                |
|--------|----------------|----------------|
| Bottom | 1.829 to 4.257 | 1.867 to 3.359 |
|--------|----------------|----------------|

|     |                |              |
|-----|----------------|--------------|
| Top | 29.18 to 33.16 | 2.452 to ??? |
|-----|----------------|--------------|

|                     |                |     |
|---------------------|----------------|-----|
| LogIC <sub>50</sub> | 3.994 to 4.368 | ??? |
|---------------------|----------------|-----|

|                  |               |     |
|------------------|---------------|-----|
| IC <sub>50</sub> | 9869 to 23332 | ??? |
|------------------|---------------|-----|

Goodness of Fit

|                    |    |    |
|--------------------|----|----|
| Degrees of Freedom | 12 | 12 |
|--------------------|----|----|

|           |        |        |
|-----------|--------|--------|
| R squared | 0.9832 | 0.1601 |
|-----------|--------|--------|

|                |       |       |
|----------------|-------|-------|
| Sum of Squares | 29.54 | 12.55 |
|----------------|-------|-------|

|      |       |       |
|------|-------|-------|
| Sy.x | 1.569 | 1.022 |
|------|-------|-------|

Number of points

|               |    |    |
|---------------|----|----|
| # of X values | 15 | 15 |
|---------------|----|----|

|                     |    |    |
|---------------------|----|----|
| # Y values analyzed | 15 | 15 |
|---------------------|----|----|
