# Supplementary material for: Catalytic activity and autoprocessing of murine caspase-11 mediate noncanonical inflammasome assembly in response to cytosolic LPS
Source: eLife journal article supplement (doi:10.7554/elife.83725), 2023-12-07
Supplement: fig2-data5 [file Figure_2F_Dose_curve_data.xlsx]

## Sheet: Fig. 2F_zVAD
Raw values for Figure 2F
			% Speck formation
	[zVAD] (μM)	Log(2)[zVAD]	WT			C254A
	DMSO	1.64386	31.6092	30.5648	31.087	4.34783	3.04054	3.69418
	25	4.64386	12.3711	8.75912	10.5651	2.22222	3.75427	2.98824
	50	5.64386	5.64516	1.40845	3.52681	0	4.03587	2.01794
	100	6.64386	3.01508	5.09554	4.05531	2.38095	3.31325	2.8471
	200	7.64386	4.5045	0.653595	2.57905	2.9661	3.125	3.04555
	Statistics	WT	C254A
	Log(inhibitor) vs. response (three parameters)]
	Y=Bottom + (Top-Bottom)/(1+10^(X-LogIC50))
	Best-fit values
	Bottom	3.046	2.658
	Top	31.17	3.702
	LogIC50	4.201	4.094
	IC50	15869	12416
	Span	28.12	1.044
	95% CI (profile likelihood)
	Bottom	1.829 to 4.257	1.867 to 3.359
	Top	29.18 to 33.16	2.452 to ???
	LogIC50	3.994 to 4.368	???
	IC50	9869 to 23332	???
	Goodness of Fit
	Degrees of Freedom	12	12
	R squared	0.9832	0.1601
	Sum of Squares	29.54	12.55
	Sy.x	1.569	1.022
	Number of points
	# of X values	15	15
	# Y values analyzed	15	15
