# Supplementary material for: Catalytic activity and autoprocessing of murine caspase-11 mediate noncanonical inflammasome assembly in response to cytosolic LPS
Source: eLife journal article supplement (doi:10.7554/elife.83725), 2023-12-07
Supplement: fig4-data3 [file elife-83725-fig4-data3-v1.zip]

**% Speck formation**

| Plasmid amount (ng) | Log(2) (plasmid) | WT-mCh    |          |          | C254A-mCh |          |          |
|---------------------|------------------|-----------|----------|----------|-----------|----------|----------|
| 0                   | 4.96578428       | 19.20904  | 27.77778 | 26.0274  | 0         | 0.46729  | 1.449275 |
| 62.5                | 5.96578428       | 25.342466 | 22.44898 | 20.75472 | 0         | 0        | 5.517241 |
| 125                 | 6.96578428       | 31.443299 | 20.18779 | 27.5     | 6.796117  | 8.888889 | 12.23022 |
| 250                 | 7.96578428       | 27.922078 | 24.8731  | 27.86885 | 11.05769  | 8.900524 | 17.85714 |
| 500                 | 8.96578428       | 35.333333 | 33.73494 | 37.2093  | 16        | 21.01449 | 25       |

**Statistics**

**WT-mCh**

**C254A-mCh**

Log(agonist) vs. response (three parameters)

$Y = \text{Bottom} + (\text{Top} - \text{Bottom}) / (1 + 10^{-(\text{LogEC50} - X)})$

Best-fit values

Bottom 24.32 0.9816

Top 40.83 18.56

LogEC50 8.655 7.181

EC50 451474764 15181184

Span 16.51 17.57

95% CI (profile likelihood)

Bottom 21.58 to 26.92 -3.574 to 5.514

Top 31.68 to ??? 14.11 to 28.17

LogEC50 7.439 to ??? 6.374 to 8.417

EC50 27451337 to ?? 2365515 to 261150262

Goodness of Fit

Degrees of Freedom 12 12

R squared 0.6512 0.8034

Sum of Squares 145 183.3

Sy.x 3.476 3.908

Number of points

# of X values 15 15

# Y values analyzed 15 15
