# Supplementary material for: Catalytic activity and autoprocessing of murine caspase-11 mediate noncanonical inflammasome assembly in response to cytosolic LPS
Source: eLife journal article supplement (doi:10.7554/elife.83725), 2023-12-07
Supplement: fig4-data3 [file Figure_4D_Dose_curve_data.xlsx]

## Sheet: Fig_4D_source data
			% Speck formation
	Plasmid amount (ng)	Log(2) (plasmid)	WT-mCh	C254A-mCh	C254A-mCh	C254A-mCh	C254A-mCh	C254A-mCh
	0	4.96578	19.209	27.7778	26.0274	0	0.46729	1.44928
	62.5	5.96578	25.3425	22.449	20.7547	0	0	5.51724
	125	6.96578	31.4433	20.1878	27.5	6.79612	8.88889	12.2302
	250	7.96578	27.9221	24.8731	27.8689	11.0577	8.90052	17.8571
	500	8.96578	35.3333	33.7349	37.2093	16	21.0145	25
	Statistics	WT-mCh	C254A-mCh
	Log(agonist) vs. response (three parameters)
	Y=Bottom + (Top-Bottom)/(1+10^(LogEC50-X))
	Best-fit values
	Bottom	24.32	0.9816
	Top	40.83	18.56
	LogEC50	8.655	7.181
	EC50	451474764	15181184
	Span	16.51	17.57
	95% CI (profile likelihood)
	Bottom	21.58 to 26.92	-3.574 to 5.514
	Top	31.68 to ???	14.11 to 28.17
	LogEC50	7.439 to ???	6.374 to 8.417
	EC50	27451337 to ???	2365515 to 261150262
	Goodness of Fit
	Degrees of Freedom	12	12
	R squared	0.6512	0.8034
	Sum of Squares	145	183.3
	Sy.x	3.476	3.908
	Number of points
	# of X values	15	15
	# Y values analyzed	15	15
