# Supplementary material for: Catalytic activity and autoprocessing of murine caspase-11 mediate noncanonical inflammasome assembly in response to cytosolic LPS
Source: eLife journal article supplement (doi:10.7554/elife.83725), 2023-12-07
Supplement: fig4-data6 [file elife-83725-fig4-data6-v1.zip]

|                     |                  | % Speck formation |          |          |                 |          |          |
|---------------------|------------------|-------------------|----------|----------|-----------------|----------|----------|
| Plasmid amount (ng) | Log(2) (plasmid) | C254A-mCh         |          |          | C254A/D285A-mCh |          |          |
| 0                   | 5.96578428       | 2.522255193       | 3.737113 | 2.120536 | 2.102804        | 1.544944 | 1.612903 |
| 125                 | 6.96578428       | 3.03030303        | 6.954436 | 4        | 5.122951        | 6.280193 | 2.869565 |
| 250                 | 7.96578428       | 8.007117438       | 6.862745 | 14.4     | 12.33766        | 7.142857 | 8.716475 |
| 500                 | 8.96578428       | 14.37198068       | 16.44022 | 12.16545 | 15.38462        | 17.79661 | 21.90813 |

| Statistics                                                                            | C254A-mCh              | C254A/D285A-mCh   |
|---------------------------------------------------------------------------------------|------------------------|-------------------|
| Log(agonist) vs. response (three parameters)                                          |                        |                   |
| $Y = \text{Bottom} + (\text{Top} - \text{Bottom}) / (1 + 10^{-(\text{LogEC50} - X)})$ |                        |                   |
| Best-fit values                                                                       |                        |                   |
| Bottom                                                                                | 2.872                  | 2.539             |
| Top                                                                                   | 15.12                  | 20.77             |
| LogEC50                                                                               | 7.837                  | 8.159             |
| EC50                                                                                  | 68701919               | 144063072         |
| Span                                                                                  | 12.25                  | 18.23             |
| 95% CI (profile likelihood)                                                           |                        |                   |
| Bottom                                                                                | -0.4699 to 5.541       | -0.03622 to 4.975 |
| Top                                                                                   | 11.37 to 20.83         | 16.25 to 30.91    |
| LogEC50                                                                               | 7.012 to 8.647         | 7.638 to 8.857    |
| EC50                                                                                  | 10280550 to 4443469665 | 665 to 720097869  |
| Goodness of Fit                                                                       |                        |                   |
| Degrees of Freedom                                                                    | 9                      | 9                 |
| R squared                                                                             | 0.8226                 | 0.9057            |
| Sum of Squares                                                                        | 52.49                  | 48.57             |
| Sy.x                                                                                  | 2.415                  | 2.323             |
| Number of points                                                                      |                        |                   |
| # of X values                                                                         | 12                     | 12                |
| # Y values analyzed                                                                   | 12                     | 12                |
