# Supplementary material for: Catalytic activity and autoprocessing of murine caspase-11 mediate noncanonical inflammasome assembly in response to cytosolic LPS
Source: eLife journal article supplement (doi:10.7554/elife.83725), 2023-12-07
Supplement: fig4-data6 [file Figure_4H_Dose_curve_data.xlsx]

## Sheet: Fig_4H_source data
			% Speck formation
	Plasmid amount (ng)	Log(2) (plasmid)	C254A-mCh	C254A-mCh	C254A-mCh	C254A/D285A-mCh	C254A/D285A-mCh	C254A/D285A-mCh
	0	5.96578	2.52226	3.73711	2.12054	2.1028	1.54494	1.6129
	125	6.96578	3.0303	6.95444	4	5.12295	6.28019	2.86957
	250	7.96578	8.00712	6.86275	14.4	12.3377	7.14286	8.71648
	500	8.96578	14.372	16.4402	12.1655	15.3846	17.7966	21.9081
	Statistics	C254A-mCh	C254A/D285A-mCh
	Log(agonist) vs. response (three parameters)
	Y=Bottom + (Top-Bottom)/(1+10^(LogEC50-X))
	Best-fit values
	Bottom	2.872	2.539
	Top	15.12	20.77
	LogEC50	7.837	8.159
	EC50	68701919	144063072
	Span	12.25	18.23
	95% CI (profile likelihood)
	Bottom	-0.4699 to 5.540	-0.03622 to 4.975
	Top	11.37 to 20.83	16.25 to 30.91
	LogEC50	7.012 to 8.647	7.638 to 8.857
	EC50	10280550 to 443619676	43469665 to 720097869
	Goodness of Fit
	Degrees of Freedom	9	9
	R squared	0.8226	0.9057
	Sum of Squares	52.49	48.57
	Sy.x	2.415	2.323
	Number of points
	# of X values	12	12
	# Y values analyzed	12	12
