# Supplementary material for: Catalytic activity and autoprocessing of murine caspase-11 mediate noncanonical inflammasome assembly in response to cytosolic LPS
Source: eLife journal article supplement (doi:10.7554/elife.83725), 2023-12-07
Supplement: fig4-figsupp1-data1 [file elife-83725-fig4-figsupp1-data1-v1.zip]

% Cytotoxicity (% LDH release)

| mCh-tagged Plasmid amount (ng) | Log(2) (mCh-tagged plasmid) | Empty      |            |            | C254A-mCh  |            |            | C254A/D285A-mCh |            |            |
|--------------------------------|-----------------------------|------------|------------|------------|------------|------------|------------|-----------------|------------|------------|
| 0                              | 5.96578428                  | 0.70493454 | 0.04028197 | 4.3138332  | 7.28005127 | 0.28746681 | 5.83539321 | 3.41298178      | 17.0356129 | 0.51817266 |
| 125                            | 6.96578428                  | 13.5969972 | 21.1718392 | 19.3701364 | 22.4297354 | 16.6346242 | 12.8114987 | 6.34624187      | 23.6381946 | 18.8922457 |
| 250                            | 7.96578428                  | 16.854344  | 12.9158656 | 13.0916415 | 22.4297354 | 20.3039458 | 13.4486863 | 12.0864231      | 29.4827428 | 34.1298178 |
| 500                            | 8.96578428                  | 19.2767555 | 18.7054838 | 31.4162776 | 17.7991394 | 32.4050169 | 16.854344  | 12.7895267      | 16.0908175 | 35.1460222 |

| Statistics                                                                            | Empty          | C254A-mCh      | C254A/D285A-mCh |
|---------------------------------------------------------------------------------------|----------------|----------------|-----------------|
| Log(agonist) vs. response (three parameters)                                          |                |                |                 |
| $Y = \text{Bottom} + (\text{Top} - \text{Bottom}) / (1 + 10^{-(\text{LogEC50} - X)})$ |                |                |                 |
| Best-fit values                                                                       |                |                |                 |
| Bottom                                                                                | -1148          | -4.958         | 3.657           |
| Top                                                                                   | 19.13          | 20.89          | 23.59           |
| LogEC50                                                                               | 4.146          | 6.206          | 6.676           |
| EC50                                                                                  | 14010          | 1607592        | 4742777         |
| Span                                                                                  | 1167           | 25.85          | 19.94           |
| 95% CI (profile likelihood)                                                           |                |                |                 |
| Bottom                                                                                | ???            | ??? to 11.05   | ??? to 19.44    |
| Top                                                                                   | 14.83 to 24.62 | 15.78 to 26.84 | 14.14 to ???    |
| LogEC50                                                                               | ??? to 7.150   | ??? to 7.705   | ???             |
| EC50                                                                                  | ??? to 141336  | ??? to 507372  | ???             |
| Goodness of Fit                                                                       |                |                |                 |
| Degrees of Freedom                                                                    | 9              | 9              | 9               |
| R squared                                                                             | 0.7027         | 0.6497         | 0.3651          |
| Sum of Squares                                                                        | 270.1          | 286.1          | 911.8           |
| Sy.x                                                                                  | 5.478          | 5.638          | 10.07           |
| Number of points                                                                      |                |                |                 |
| # of X values                                                                         | 12             | 12             | 12              |
| # Y values analyzed                                                                   | 12             | 12             | 12              |
