# Supplementary material for: Catalytic activity and autoprocessing of murine caspase-11 mediate noncanonical inflammasome assembly in response to cytosolic LPS
Source: eLife journal article supplement (doi:10.7554/elife.83725), 2023-12-07
Supplement: fig4-figsupp1-data1 [file Figure4-figure supplement 1B_Dose_curve_data.xlsx]

## Sheet: Fig_S5B_source data
			% Cytotoxicity (% LDH release)
	mCh-tagged Plasmid amount (ng)	Log(2) (mCh-tagged plasmid)	Empty			C254A-mCh			C254A/D285A-mCh
	0	5.96578	0.704935	0.040282	4.31383	7.28005	0.287467	5.83539	3.41298	17.0356	0.518173
	125	6.96578	13.597	21.1718	19.3701	22.4297	16.6346	12.8115	6.34624	23.6382	18.8922
	250	7.96578	16.8543	12.9159	13.0916	22.4297	20.3039	13.4487	12.0864	29.4827	34.1298
	500	8.96578	19.2768	18.7055	31.4163	17.7991	32.405	16.8543	12.7895	16.0908	35.146
	Statistics	Empty	C254A-mCh	C254A/D285A-mCh
	Log(agonist) vs. response (three parameters)
	Y=Bottom + (Top-Bottom)/(1+10^(LogEC50-X))
	Best-fit values
	Bottom	-1148	-4.958	3.657
	Top	19.13	20.89	23.59
	LogEC50	4.146	6.206	6.676
	EC50	14010	1607592	4742777
	Span	1167	25.85	19.94
	95% CI (profile likelihood)
	Bottom	???	??? to 11.05	??? to 19.44
	Top	14.83 to 24.62	15.78 to 26.84	14.14 to ???
	LogEC50	??? to 7.150	??? to 7.705	???
	EC50	??? to 14133697	??? to 50737207	???
	Goodness of Fit
	Degrees of Freedom	9	9	9
	R squared	0.7027	0.6497	0.3651
	Sum of Squares	270.1	286.1	911.8
	Sy.x	5.478	5.638	10.07
	Number of points
	# of X values	12	12	12
	# Y values analyzed	12	12	12
