# Supplementary material for: Catalytic activity and autoprocessing of murine caspase-11 mediate noncanonical inflammasome assembly in response to cytosolic LPS
Source: eLife journal article supplement (doi:10.7554/elife.83725), 2023-12-07
Supplement: fig7-data2 [file elife-83725-fig7-data2-v1.zip]

| V5-TEV protease plasmid amount (ng) | Log(2) (V5-TEV) | % Speck formation |          |         |                |          |          |
|-------------------------------------|-----------------|-------------------|----------|---------|----------------|----------|----------|
|                                     |                 | WT(TEV)-mCh       |          |         | C254A(TEV)-mCh |          |          |
| 0                                   | 4.96578428      | 4.787234          | 5.274725 | 3.21285 | 7.575758       | 10.625   | 10.49383 |
| 62.5                                | 5.96578428      | 11.842105         | 2.212389 | 10.0877 | 8.219178       | 13.31058 | 6.808511 |
| 125                                 | 6.96578428      | 12.598425         | 6.060606 | 6.42202 | 11.68831       | 12.80788 | 4.511278 |
| 250                                 | 7.96578428      | 26.623377         | 15.28926 | 15.8046 | 8.490566       | 11.19048 | 5.882353 |
| 500                                 | 8.96578428      | 23.214286         | 14.36782 | 19.1176 | 6.818182       | 6.077348 | 1.824818 |

| Statistics                                                                            | WT(TEV)-mCh          | C254A(TEV)-mCh |
|---------------------------------------------------------------------------------------|----------------------|----------------|
| Log(agonist) vs. response (three parameters)                                          |                      |                |
| $Y = \text{Bottom} + (\text{Top} - \text{Bottom}) / (1 + 10^{-(\text{LogEC50} - X)})$ |                      |                |
| Best-fit values                                                                       |                      |                |
| Bottom                                                                                | 5.484                | 9.596          |
| Top                                                                                   | 20.31                | 1.964          |
| LogEC50                                                                               | 7.339                | 8.763          |
| EC50                                                                                  | 21846686             | 579593975      |
| Span                                                                                  | 14.83                | -7.632         |
| 95% CI (profile likelihood)                                                           |                      |                |
| Bottom                                                                                | 1.127 to 9.415       | 7.600 to 11.86 |
| Top                                                                                   | 15.45 to 26.19       | ??? to 8.468   |
| LogEC50                                                                               | 6.434 to 8.122       | 5.498 to ???   |
| EC50                                                                                  | 2716447 to 132314544 | to ???         |
| Goodness of Fit                                                                       |                      |                |
| Degrees of Freedom                                                                    | 12                   | 12             |
| R squared                                                                             | 0.6871               | 0.3303         |
| Sum of Squares                                                                        | 238.2                | 98.66          |
| Sy.x                                                                                  | 4.455                | 2.867          |
| Number of points                                                                      |                      |                |
| # of X values                                                                         | 15                   | 15             |
| # Y values analyzed                                                                   | 15                   | 15             |
