# Supplementary material for: Catalytic activity and autoprocessing of murine caspase-11 mediate noncanonical inflammasome assembly in response to cytosolic LPS
Source: eLife journal article supplement (doi:10.7554/elife.83725), 2023-12-07
Supplement: fig7-data2 [file Figure_7D_Dose_curve_data.xlsx]

## Sheet: Fig_7D_source data
			% Speck formation
	V5-TEV protease plasmid amount (ng)	Log(2) (V5-TEV)	WT(TEV)-mCh	C254A-mCh	C254A-mCh	C254A(TEV)-mCh	C254A-mCh	C254A-mCh
	0	4.96578	4.78723	5.27473	3.21285	7.57576	10.625	10.4938
	62.5	5.96578	11.8421	2.21239	10.0877	8.21918	13.3106	6.80851
	125	6.96578	12.5984	6.06061	6.42202	11.6883	12.8079	4.51128
	250	7.96578	26.6234	15.2893	15.8046	8.49057	11.1905	5.88235
	500	8.96578	23.2143	14.3678	19.1176	6.81818	6.07735	1.82482
	Statistics	WT(TEV)-mCh	C254A(TEV)-mCh
	Log(agonist) vs. response (three parameters)
	Y=Bottom + (Top-Bottom)/(1+10^(LogEC50-X))
	Best-fit values
	Bottom	5.484	9.596
	Top	20.31	1.964
	LogEC50	7.339	8.763
	EC50	21846686	579593975
	Span	14.83	-7.632
	95% CI (profile likelihood)
	Bottom	1.127 to 9.415	7.600 to 11.86
	Top	15.45 to 26.19	??? to 8.468
	LogEC50	6.434 to 8.122	5.498 to ???
	EC50	2716447 to 132436370	314544 to ???
	Goodness of Fit
	Degrees of Freedom	12	12
	R squared	0.6871	0.3303
	Sum of Squares	238.2	98.66
	Sy.x	4.455	2.867
	Number of points
	# of X values	15	15
	# Y values analyzed	15	15
